# Supplementary material
Source: PubMed Central journal article supplement (PMC4000796)
Supplement: 1403157111_pnas.201403157SI.pdf [file 1403157111_pnas.201403157SI.pdf]

# Supporting Information

Davis et al. 10.1073/pnas.1403157111

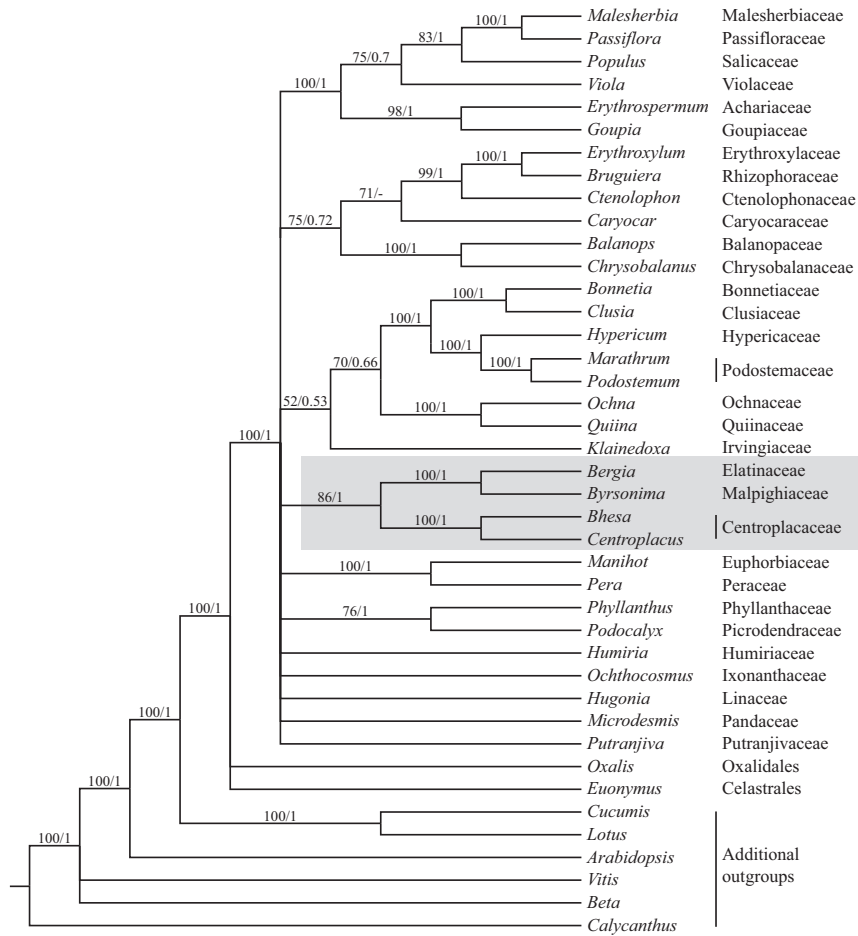

**Fig. S1.** Malpighiales phylogeny inferred from nucleotide sequences of the plastid inverted repeat region. Fifty-percent maximum-likelihood majority-rule consensus phylogeny is shown here. Well-supported relationships between Centroplacaceae, Elatinaceae, and Malpighiaceae are highlighted in gray. Values are maximum-likelihood bootstrap percentages and Bayesian posterior probabilities, respectively.

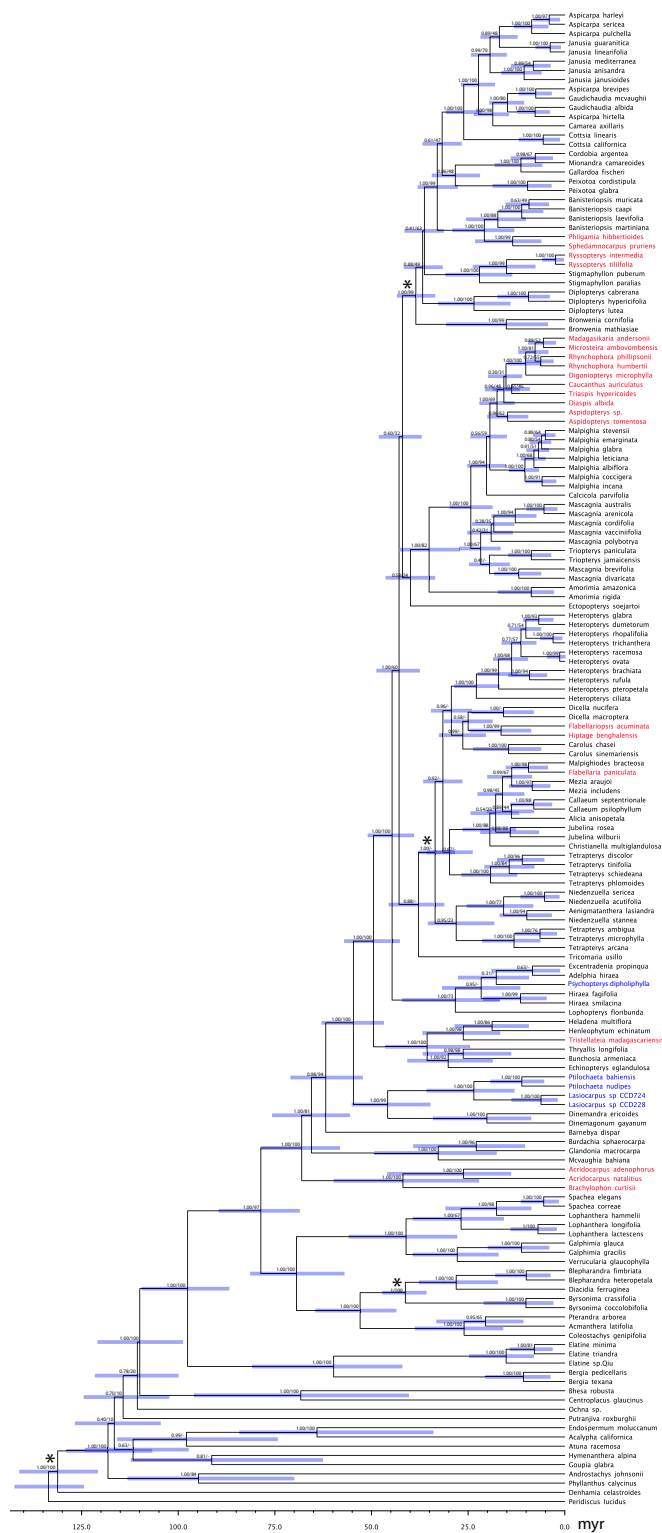

**Fig. S2.** Phylogeny and divergence time estimates of Malpighiaceae inferred using BEAST. The three fossil calibration points described in the main text are starred. Old World clades that have lost the oil-bee association are shown in red; New World clades that have lost the oil-bee association are shown in blue. Numbers near nodes are Bayesian posterior probabilities/maximum-likelihood bootstrap percentages; a hyphen indicates that the node is not present in the maximum-likelihood 50% majority-rule consensus tree. Divergence time estimates in million years with associated confidence intervals are shown in blue.

**Table S1. Morphological characters scored by Davis and Anderson (1)**

| Traits                                            | Score                                                                                                                                                                                                                                                                                                                                                                       |
|---------------------------------------------------|-----------------------------------------------------------------------------------------------------------------------------------------------------------------------------------------------------------------------------------------------------------------------------------------------------------------------------------------------------------------------------|
| 1. Habit                                          | 0: tree or woody shrub; 1: erect suffrutex; 2: trailing suffrutex; 3: vine; 4: herb                                                                                                                                                                                                                                                                                         |
| 2. Stems rooting at nodes                         | 0: no; 1: yes                                                                                                                                                                                                                                                                                                                                                               |
| 3. Vegetative hairs                               | 0: unicellular; 1: multicellular                                                                                                                                                                                                                                                                                                                                            |
| 4. Vegetative hairs                               | 0: 2-branched; 1: basifixed; 2: stellate                                                                                                                                                                                                                                                                                                                                    |
| 5. Phyllotaxy                                     | 0: opposite or whorled; 1: alternate                                                                                                                                                                                                                                                                                                                                        |
| 6. Stipule position                               | 0: stem between petioles or beside petiole; 1: petiole margin; 2: petiole inner face; 3: not present                                                                                                                                                                                                                                                                        |
| 7. Stipule connation                              | 0: distinct; 1: connate, same leaf; 2: connate, opposite leaves; 3: connate, opposite and same leaves; 4: not present                                                                                                                                                                                                                                                       |
| 8. Stipule persistence                            | 0: long-persistent; 1: soon-deciduous; 2: not present                                                                                                                                                                                                                                                                                                                       |
| 9. Stipules enclosing buds                        | 0: no; 1: yes                                                                                                                                                                                                                                                                                                                                                               |
| 10. Petiole glands                                | 0: absent; 1: present                                                                                                                                                                                                                                                                                                                                                       |
| 11. Lamina margin                                 | 0: without true teeth; 1: toothed                                                                                                                                                                                                                                                                                                                                           |
| 12. Lamina glands                                 | 0: absent; 1: abaxial surface; 2: margin or v. sl. within; 3: adaxial surface                                                                                                                                                                                                                                                                                               |
| 13. Inflorescence position                        | 0: terminal or terminal and axillary; 1: axillary                                                                                                                                                                                                                                                                                                                           |
| 14. Inflorescence ultimate units                  | 0: pseudoraceme or thyrse; 1: umbel of (2)4(6) flowers; 2: umbel of >six flowers; 3: 1(2) flower(s); 4: verticil of four flowers; 5: spike; 6: consistently two flowers                                                                                                                                                                                                     |
| <b>15. Inflorescence decussate</b>                | <b>0: mostly not; 1: all or mostly yes; 2: proximally decussate, distally not; 3: too tight to tell; 4: single flowers</b>                                                                                                                                                                                                                                                  |
| 16. Cincinni                                      | 0: one-flowered; 1: two to several-flowered                                                                                                                                                                                                                                                                                                                                 |
| 17. Bract and bracteole size                      | 0: full-sized leaves; 1: much reduced; 2: apparently absent                                                                                                                                                                                                                                                                                                                 |
| 18. Bracts and bracteoles scalelike               | 0: no; 1: yes; 2: absent                                                                                                                                                                                                                                                                                                                                                    |
| 19. Bract persistence                             | 0: persistent; 1: deciduous; 2: absent                                                                                                                                                                                                                                                                                                                                      |
| 20. Peduncle                                      | 0: 0–1 mm long; 1: >1 mm long                                                                                                                                                                                                                                                                                                                                               |
| 21. Pedicel                                       | 0: well developed, > bracteoles; 1: absent or very short, < bracteoles                                                                                                                                                                                                                                                                                                      |
| 22. Bracteole glands                              | 0: eglandular; 1: one or both glandular; 2: bracteoles absent                                                                                                                                                                                                                                                                                                               |
| 23. Bracteole persistence                         | 0: persistent; 1: deciduous; 2: absent                                                                                                                                                                                                                                                                                                                                      |
| 24. Bracteoles enclosing buds                     | 0: no; 1: yes; 2: absent                                                                                                                                                                                                                                                                                                                                                    |
| 25. Cleistogamous flowers                         | 0: absent; 1: present                                                                                                                                                                                                                                                                                                                                                       |
| <b>26. Breeding system</b>                        | <b>0: bisexual; 1: morphologically bisexual, functionally unisexual; 2: morphologically bisexual or male; 3: unisexual, dioecious</b>                                                                                                                                                                                                                                       |
| 27. Sepal number                                  | 0: 5; 1: 2–4                                                                                                                                                                                                                                                                                                                                                                |
| 28. Sepal aestivation                             | 0: imbricate; 1: valvate                                                                                                                                                                                                                                                                                                                                                    |
| 29. Sepal margin, glands                          | 0: absent; 1: present                                                                                                                                                                                                                                                                                                                                                       |
| 30. Calyx in anthesis                             | 0: erect or appressed; 1: revolute; 2: reflexed                                                                                                                                                                                                                                                                                                                             |
| 31. Calyx in fruit                                | 0: hardly enlarged; 1: enlarged, papery                                                                                                                                                                                                                                                                                                                                     |
| 32. Calyx glands                                  | 0: none; 1: 10 on five sepals; 2: eight on lateral four sepals; 3: four (fused) on lateral four sepals; 4: up to five glands; 5: six on lateral four sepals                                                                                                                                                                                                                 |
| 33. Calyx gland attachment                        | 0: completely on free sepals; 1: half or more on free sepals; 2: mostly below free sepals; 3: not present                                                                                                                                                                                                                                                                   |
| <b>34. Calyx glands long-stalked</b>              | <b>0: no; 1: yes; 2: not present</b>                                                                                                                                                                                                                                                                                                                                        |
| 35. Petal number                                  | 0: five; 1: two to four                                                                                                                                                                                                                                                                                                                                                     |
| 36. Petals in bud                                 | 0: exposed; 1: concealed by sepals                                                                                                                                                                                                                                                                                                                                          |
| 37. Petal color                                   | 0: yellow; 1: pink (+white); 2: white; 3: lilac                                                                                                                                                                                                                                                                                                                             |
| <b>38. Petals clawed</b>                          | <b>0: yes; 1: no</b>                                                                                                                                                                                                                                                                                                                                                        |
| 39. Petal hairs                                   | 0: absent; 1: present, abaxial surface; 2: present, adaxial surface; 3: present, margin                                                                                                                                                                                                                                                                                     |
| <b>40. Corolla symmetry</b>                       | <b>0: nearly radial; 1: bilateral, NW type; 2: bilateral, <i>Acridocarpus</i> type</b>                                                                                                                                                                                                                                                                                      |
| 41. Disk                                          | 0: absent; 1: present                                                                                                                                                                                                                                                                                                                                                       |
| 42. Stamen number (in bisexual or male flowers)   | 0: >10; 1: 10; 2: 7–9; 3: six opposite sepals + posterior petal; 4: five opposite sepals; 5: 1–4                                                                                                                                                                                                                                                                            |
| 43. Stamens sterile (in bisexual or male flowers) | 0: none; 1: staminodes opposite five sepals; 2: staminodes opposite anterior-lateral sepals; 3: posterior three staminodes; 4: filament opposite posterior petal without anther; 5: staminodes opposite posterior-lateral sepals; 6: staminodes opposite petals, posterior-lateral sepals; 7: staminodes opposite three anterior sepals; 8: staminodes opposite five petals |
| 44. Filament sizes (fertile)                      | 0: subequal; 1: longer opposite sepals; 2: longer opposite some or all petals; 3: longer opposite sepals, posterior-lateral petals; 4: anterior three shorter; 5: posterior three shorter; 6: shorter opposite posterior-lateral petals; 7: very long opposite anterior sepal; 8: stouter opposite posterior-lateral petals; 9: anterior one shorter                        |
| 45. Filament fusion                               | 0: distinct; 1: connate at base or higher                                                                                                                                                                                                                                                                                                                                   |
| <b>46. Anther hairs</b>                           | <b>0: absent; 1: present</b>                                                                                                                                                                                                                                                                                                                                                |
| 47. Anther bristles, apex                         | 0: absent; 1: present                                                                                                                                                                                                                                                                                                                                                       |
| 48. Anther wings                                  | 0: absent; 1: present                                                                                                                                                                                                                                                                                                                                                       |

**Table S1. Cont.**

| Traits                                               | Score                                                                                                                                                                                                                                                                                                          |
|------------------------------------------------------|----------------------------------------------------------------------------------------------------------------------------------------------------------------------------------------------------------------------------------------------------------------------------------------------------------------|
| 49. Anther dehiscence                                | 0: longitudinal slits; 1: apical or subapical pores                                                                                                                                                                                                                                                            |
| 50. Connective extended, fleshy (fertile anthers)    | 0: no; 1: yes                                                                                                                                                                                                                                                                                                  |
| 51. Anther size (fertile)                            | 0: subequal; 1: larger opposite sepals; 2: larger opposite petals; 3: larger opposite posterior-lateral petals; 4: posterior three smaller; 5: smaller opposite anterior-lateral petals; 6: anterior three smaller; 7: anterior one larger; 8: larger opposite three anterior sepals; 9: anterior three larger |
| 52. Androecium symmetry                              | 0: nearly radial; 1: strongly bilateral                                                                                                                                                                                                                                                                        |
| 53. Pollen symmetry                                  | 0: radial; 1: global                                                                                                                                                                                                                                                                                           |
| 54. Pollen ectoapertures                             | 0: present; 1: absent                                                                                                                                                                                                                                                                                          |
| 55. Endoapertures, number                            | 0: 3; 1: 4–12                                                                                                                                                                                                                                                                                                  |
| 56. Pollen diameter ( $\mu\text{m}$ )                | 0: $\leq 22$ ; 1: $>22$                                                                                                                                                                                                                                                                                        |
| 57. Receptacle hairs between filaments and gynoecium | 0: absent or nearly so; 1: present, abundant                                                                                                                                                                                                                                                                   |
| 58. Carpel number (chasmogamous flowers)             | 0: three; 1: two; 2: five                                                                                                                                                                                                                                                                                      |
| 59. Ovules per locule                                | 0: one (or none); 1: two or more                                                                                                                                                                                                                                                                               |
| 60. Carpels sterile                                  | 0: none; 1: anterior; 2: one posterior; 3: anterior +one posterior                                                                                                                                                                                                                                             |
| 61. Carpel fusion in ovary                           | 0: distinct or connate at base only; 1: connate whole ventral face or axis                                                                                                                                                                                                                                     |
| 62. Style number (chasmogamous flowers)              | 0: as many as carpels; 1: one on anterior carpel; 2: two on posterior carpels; 3: two on anterior carpel + one posterior carpel                                                                                                                                                                                |
| 63. Style fusion                                     | 0: distinct; 1: connate in styles; 2: connate in stigmas                                                                                                                                                                                                                                                       |
| 64. Gynoecium symmetry                               | 0: nearly radial; 1: strongly bilateral                                                                                                                                                                                                                                                                        |
| <b>65. Style thickness</b>                           | <b>0: subulate, slender; 1: uniform, thick; 2: uniform, slender</b>                                                                                                                                                                                                                                            |
| <b>66. Stigma</b>                                    | <b>0: terminal or nearly so, tiny; 1: internal, short, large; 2: internal, long-decurrent, large; 3: internal, tiny; 4: terminal, large, capitate or truncate; 5: terminal, large, reniform; 6: terminal, large, elongated</b>                                                                                 |
| 67. Style dorsal extension                           | 0: none; 1: angle to hook; 2: foliole                                                                                                                                                                                                                                                                          |
| <b>68. Styles distally</b>                           | <b>0: entire; 1: bifid</b>                                                                                                                                                                                                                                                                                     |
| 69. Fruit texture                                    | 0: dry; 1: fleshy                                                                                                                                                                                                                                                                                              |
| 70. Fruit dehiscence                                 | 0: schizocarpic, not releasing seed; 1: indehiscent; 2: loculicidally dehiscent, releasing seeds; 3: septicidally dehiscent, releasing seeds                                                                                                                                                                   |
| 71. Fruit wall                                       | 0: smooth; 1: setiferous; 2: dorsal wing dominant; 3: lateral wing(s) dominant; 4: winglets, ruffles; 5: aculeate; 6: dorsal or dorsal+lateral crest(s)                                                                                                                                                        |
| 72. Carpophore                                       | 0: absent; 1: present                                                                                                                                                                                                                                                                                          |
| 73. Eumascagnoid disk                                | 0: absent; 1: present                                                                                                                                                                                                                                                                                          |
| 74. Aril                                             | 0: absent; 1: present                                                                                                                                                                                                                                                                                          |
| 75. Endosperm                                        | 0: absent; 1: present                                                                                                                                                                                                                                                                                          |

Characters with significant difference between oil-bee pollinated clades are highlighted in bold. An acceleration in trait diversification in oil-bee clades is indicated in blue; a deceleration in oil-bee free clades are in bold and italics.

1. Davis CC, Anderson WR (2010) A complete generic phylogeny of Malpighiaceae inferred from nucleotide sequence data and morphology. *Am J Bot* 97(12):2031–2048.
